# Supplementary material
Source: ML conference proceedings conference paper supplement (https://openreview.net/forum?id=Vw1V9AgPXW)
Supplement: supplementary_material [file attachment]

## Sheet: Sheet1
lat	lon
45.808	73.5721
41.7544	42.8231
52.1393	-4.5566
24.4312	54.448
24.4315	54.4478
9.076	7.493
5.20913	-52.7484
27.88	-15.443
32.8725	-105.812
64.9737	-147.517
64.9735	-147.518
-35.12	117.899
36.7533	3.381
36.7533	3.381
45.9554	-78.0727
40.817	-121.47
-23.028	-67.755
65.1298	-147.471
74.7294	-94.9062
32.0808	35.837
36.1805	-121.644
50.0006	28.9973
36.7	126.47
40.1408	32.9897
40.1407	32.9897
40.1403	32.99
17.1373	-61.7752
17.137	-61.7743
17.1366	-61.7743
39.169	-76.8983
39.1682	-76.8984
22.453	114.188
38.9383	-122.148
18.3435	-66.7531
-16.4657	-71.4931
36.741	127.018
-7.9748	-14.4147
-7.97281	-14.401
-7.90663	-14.4025
41.0161	-73.9414
33.9309	-84.1086
33.9309	-84.1084
38.296	-76.378
33.7396	-106.365
-42.8056	147.438
-14.3755	132.152
-29.0471	115.346
35.0942	33.888
40.072	116.257
13.0348	77.5117
13.0348	77.5117
13.03	77.51
13.7172	100.543
13.7172	100.543
41.137	16.847
41.1377	16.8477
22.06	-159.78
21.988	-159.763
22.058	-159.777
22.0569	-159.782
22.0593	-159.782
22.058	-159.779
22.0619	-159.781
22.0682	-159.773
-5.9236	-35.1613
26.0714	50.6114
39.908	116.42
37.8794	-122.243
32.3513	-64.6579
32.3512	-64.6588
32.3538	-64.6561
32.3479	-64.6534
8.3646	171.043
44.32	-1.25
44.2742	-1.2727
44.3917	-1.2335
44.3659	-1.262
44.3755	-1.2396
44.2882	-1.2675
44.3917	-1.2325
44.295	-1.276
-78.1296	166.15
2.82	-60.67
51.427	7.19257
-15.8572	-47.9027
-15.8572	-47.9027
5.11401	-52.645
4.94888	-52.3095
-27.5539	153.131
43.6468	41.4404
-24.7583	152.413
34.6625	-120.552
34.6623	-120.552
-12.0307	-77.1298
28.4311	-80.5949
-33.88	18.5
9.1548	92.8277
-24.905	113.721
-66.2812	110.529
55.231	37.297
40.05	116.27
38.8903	-77.4422
-12.505	-76.799
50.9608	-1.4274
58.759	-93.994
-12.2	96.85
54.41	-110.28
31.693	-2.255
51.1675	-4.04717
51.17	-4.051
22.4213	114.207
14.7248	-17.1288
-12.4765	130.981
25.1933	67.0992
37.4085	-122.18
37.9048	39.9932
36.88	9.714
51.4994	0.058858
51	60
50.9855	60.6499
51.0209	59.5677
51.0226	59.8087
51.0304	59.6895
51.0363	59.9584
51.0536	60.4926
51.0692	59.4844
51.0797	59.7482
51.0945	59.8421
51.0935	59.8443
51.0969	60.0873
51.1023	59.5765
51.1148	59.6345
51.1468	60.676
51.1509	59.5969
51.1533	59.5247
51.1548	59.7482
51.1684	59.9676
51.1932	59.6351
51.2019	60.7654
51.2071	59.85
51.2411	60.607
51.2418	60.608
51.2489	60.1422
51.2591	60.4615
51.2649	60.859
51.2701	60.3015
51.3018	60.7287
51.3388	60.1638
51.3468	60.4727
51.3793	60.3725
51.5036	60.1783
51.522	59.9725
51.5264	59.8015
51.5474	59.9116
51.5587	59.957
51.5885	60.0824
51.6007	59.9269
50.6584	59.6554
50.6815	59.7919
50.7563	59.5979
50.7757	59.7745
50.8377	59.5951
50.8773	60.5246
50.8836	59.7319
50.9593	60.5269
50.9727	59.5511
49.3209	-119.62
44.7864	1.2381
25.81	-80.3525
34.9498	-117.887
-34.731	138.65
56.738	37.251
61.2995	-149.447
52.72	174.07
-27.1502	-109.437
53.6782	-113.316
53.6782	-113.316
34.9705	-117.931
34.9381	-118.091
34.9607	-117.912
34.9577	-117.912
34.9608	-117.911
50.525	6.88342
29.6773	-85.3459
30.4217	-86.798
37.098	-6.733
-34.6	-58.6
51.9533	-8.1758
28.301	-16.5119
67.893	21.105
67.8931	21.1018
67.8931	21.1029
67.8943	21.1062
67.8934	21.103
67.8933	21.1064
67.8932	21.1054
25.0306	55.1247
67.237	15.302
50.6166	7.12982
42.6176	-71.4923
25.616	-80.3838
25.6163	-80.3838
32.0737	-106.153
58.7342	-93.8203
63.95	-145.73
31.5568	-110.438
31.571	-110.371
39.104	-76.757
40.321	-74.036
35.4487	-108.599
43.2798	2.12416
40.4555	-4.1697
19.09	74.05
38.491	68.6818
53.3127	-60.466
27	-15.3
26.6255	-78.2985
26.6156	-78.3478
26.6254	-78.2991
21.4605	-71.1319
21.4626	-71.1321
43.7546	6.92157
44.0715	5.5346
47.348	5.515
-62.2166	-58.9626
38.4359	-79.8282
38.4258	-79.8525
38.4296	-79.8434
38.4372	-79.8313
38.4333	-79.8224
38.4368	-79.8255
38.4377	-79.8358
38.942	-110.076
38.9416	-110.078
38.9413	-110.075
38.9426	-110.074
38.999	-76.8407
38.9987	-76.841
38.9984	-76.8428
38.9982	-76.8419
39.0203	-76.8275
39.0203	-76.8278
13.5876	144.841
13.5873	144.841
38.8503	-76.93
13.5783	144.939
13.5783	144.939
36.426	138.955
62.393	-145.151
20.8012	106.71
30.88	-3.06
30.8565	-3.1241
30.8601	-3.0851
30.8935	-3.0357
30.8712	-3.0081
21.5207	-157.996
19.0136	-155.663
27.7634	-15.6307
50.8674	0.336124
32.88	-106.07
32.8954	-106.071
32.9015	-106.099
32.8866	-106.075
32.9263	-106.148
32.88	-106.06
22.2758	114.144
18.1494	-65.788
9.0856	167.475
37.393	126.649
45.908	63.334
45.704	63.34
52.877	103.259
4.8717	114.923
-23.1852	-46.5582
-6.12617	106.656
36.4031	-121.647
21.6548	39.1427
-11.951	-76.874
16.733	-169.53
-31.3233	136.777
26.9822	-80.1076
26.983	-80.1082
26.9838	-80.1087
34.2031	-118.173
29.5617	-95.09
21.4047	-157.832
21.4048	-157.831
48.5	46.1
48.5992	46.298
48.5969	46.298
48.5609	46.2949
48.5609	46.2959
48.5695	46.2949
48.5695	46.2959
48.5688	46.2949
48.5688	46.2958
48.5616	46.2958
48.5617	46.2949
48.5508	46.295
48.5487	46.295
48.5481	46.297
48.4116	46.2621
48.4763	46.3175
48.8055	45.7346
48.6149	46.3009
48.5807	46.298
48.5709	45.9074
48.4841	46.318
48.54	46.2978
48.5405	46.3001
48.6158	46.299
48.7819	45.7819
48.7831	45.8152
48.812	45.7162
24.946	67.136
22.1263	-159.665
25.1353	121.757
4.439	103.475
39.1337	66.8863
57.4554	-152.374
48.935	22.2739
52.1784	5.80977
5.1664	-52.7007
43.8254	41.3427
43.7183	41.2262
66.3922	19.32
21.4731	-158.055
25.0273	102.796
7.65	167.7
8.72168	167.726
8.72163	167.727
33.07	-96.056
5.33198	115.198
29.3632	-98.5904
48.7514	-3.47
18.9858	-97.3149
51.184	-1.044
33.7224	44.2079
32.34	13.236
-33.956	-71.401
53.2365	-2.30872
26.9133	80.9573
47.0671	15.4934
33.9849	-107.189
38.6733	66.8964
10.598	-66.982
10.599	-66.9865
-5.06667	119.55
28.025	-80.684
2.784	101.508
-3.02317	-60.054
52.0597	1.2874
38.8503	-76.93
38.3742	-77.2307
27.764	-15.634
28.32	-96.46
20.7006	-156.257
18.2111	-67.1368
29	-78.5
30.6803	-104.015
-77.8	166.4
44.5208	11.6469
28.4636	-80.653
28.6259	-80.6828
28.4247	-80.6644
28.4786	-80.6748
48.5895	-98.3565
37.832	-75.49
37.8338	-75.4882
37.8312	-75.4913
38.498	-77.373
42.6174	-71.491
42.6196	-71.4912
40.558	116.976
39.1335	141.133
35.3316	-116.888
51.6217	100.919
32.8917	-116.423
45.3425	-123.287
55.7433	37.7227
55.843	37.626
-35.3161	149.01
20.7084	-156.257
20.7085	-156.258
20.7081	-156.257
20.7085	-156.258
20.7085	-156.258
31.6842	-110.878
32.4417	-110.789
32.4421	-110.789
34.854	136.106
48.378	22.708
-1.28	36.82
42.9353	132.577
42.8587	132.791
22.82	108.37
-5.92781	-35.1645
35.573	24.175
44.7278	34.0157
37.117	14.44
37.945	-121.347
36.9505	-76.3088
26.2073	50.61
-7.266	72.363
31.0234	34.9728
64.646	39.22
56.4581	-2.98011
52.3137	14.0867
36.771	-116.114
38.85	-76.9322
35.9445	138.473
-3.87812	-38.426
36.876	14.989
78.9291	11.871
41.1086	-95.911
52.06	9.33
35.34	-99.2
38.282	69.224
68.1137	33.9107
57.3958	11.9263
57.3931	11.9178
11.384	76.666
-35.6298	148.957
-35.6279	148.957
-35.6249	148.955
37.0943	127.032
32.6007	-116.841
-24.8691	113.705
45.329	-75.674
45.3438	-75.6743
45.3287	-75.6745
31.88	5.49
-34.61	20.28
-34.6028	20.3027
-34.6174	20.2588
31.89	34.69
31.8859	34.7023
31.8848	34.6802
-64.7741	-64.0511
33.8292	-118.211
28.2273	-80.6061
28.2264	-80.5993
28.228	-80.6057
38.0808	23.883
38.0808	23.883
33.4452	-106.132
43.2763	42.4994
37.4969	-122.497
37.4977	-122.499
37.4978	-122.5
37.4978	-122.499
62.9001	40.5587
48.786	-3.521
36	-123
34.099	-119.121
34.0996	-119.121
34.0992	-119.121
65.129	-147.485
65.1295	-147.488
65.1299	-147.486
65.1299	-147.485
65.1303	-147.483
65.1292	-147.483
65.1169	-147.462
38.5577	-77.0577
39.66	124.705
-20.38	118.635
54.75	-110.05
59.7719	30.3274
18.6041	73.8657
-53.006	-70.847
56.173	37.769
40.8679	47.7955
38.4912	-77.3198
52.4806	0.5205
47.8978	11.1126
25.7927	56.0408
43.826	41.587
-8.1383	-34.925
-8.13833	-34.925
74.687	-94.8962
-53.7792	-67.7053
24.4259	46.5865
24.9107	46.4004
9.4012	167.465
36.6375	-6.367
41.693	24.744
15.2491	145.796
39.5273	9.633
32.9177	-118.487
-2.9383	40.2125
33.2798	-119.522
33.2477	-119.521
33.2484	-119.521
33.247	-119.52
-71.6725	-2.8403
-21.5963	-64.624
34.5303	-119.986
-33.489	-70.7
45.812	73.562
46.62	74.52
0	-154
40.3945	-74.1732
49.5919	14.5247
33.6676	36.3635
35.25	53.92
35.222	53.896
35.2347	53.921
35.239	53.952
35.258	53.955
49.6942	6.33028
44.579	33.386
31.0992	121.2
45.0527	33.8903
1.352	103.988
55.35	36.482
66.9856	-50.9459
67.024	-50.6
67.822	20.331
78.229	15.396
18.3573	-64.9732
22.197	114.221
34.9642	-106.464
-33.9283	18.8661
69.5	34.2
39.624	68.448
78.2329	15.3818
51.8	128.4
51.877	128.332
51.8798	128.374
51.8818	128.252
51.747	128.31
51.7734	128.409
51.792	128.185
51.7938	128.339
51.8053	128.232
51.8054	128.467
51.823	128.301
51.8357	128.276
51.837	128.366
-29.2634	-70.7323
-33.7172	151.212
-69.0061	39.5902
36.3976	127.375
22.453	114.19
58.704	11.377
55.68	12.355
35.78	51.408
28.3	-16.51
-7.9743	-14.3915
-25.91	27.71
25.2433	55.8285
35.6008	139.685
35.7088	139.492
40.8557	129.666
37.8	-116.77
40.4805	-3.4469
40.4828	-3.44474
43.5607	1.4808
43.5605	1.4808
43.5587	1.48083
25.251	55.832
34.583	-120.561
69.6623	18.9403
45.8108	73.573
33.0269	-106.139
33.0962	-106.159
22.2778	114.272
31.2519	131.079
31.251	131.082
21.3161	-157.886
38.921	-77.067
50.333	8.48
43.6992	132.166
-42.8034	147.442
57.5581	21.8578
51.817	128.25
19.29	166.618
37.5	-75
38.7943	-77.1649
-12.694	141.931
-41.152	175.505
42.6129	-71.4938
49.1444	12.878
32.4	-106.3
32.4068	-106.407
32.3396	-106.443
32.4041	-106.342
32.417	-106.322
32.4155	-106.291
32.4179	-106.28
32.4161	-106.237
32.4064	-106.349
34.2049	-106.459
32.8803	-106.465
32.5417	-106.612
32.4995	-106.609
33.8139	-106.659
33.8131	-106.659
32.358	-106.37
32.5009	-106.608
33.7212	-106.736
-30.95	136.5
-30.9553	136.532
-30.9587	136.504
-30.9433	136.521
-30.93	136.519
-30.9053	136.516
-30.9716	136.474
-30.9711	136.476
-31.074	136.439
-31.0792	136.445
-31.0328	136.463
-30.9031	136.487
-30.9573	136.533
34.445	109.494
27.7627	-15.6313
27.7627	-15.6308
27.7627	-15.6306
9.4909	138.077
-29.0465	115.347
-29.0466	115.347
-29.0449	115.351
62.4804	-114.479
42.619	-71.4912
-69.379	76.378
56.244	38.579
46.8772	7.46522
39.1361	-121.351
41.7524	-70.5386
48.7246	-97.8998
64.3002	-149.19
30.5725	-86.2147
30.9783	-100.553
33.4431	-106.997
33.113	-112.031
32.2889	-83.5361
32.6588	-86.2636
33.5464	-98.7628
40.72	141.322
37.1516	-5.5884
54.3618	-0.6701
33.33	-93.5503
32.5812	-83.5694
32.5774	-116.973
33.145	-91.0211
32.0437	-81.926
76.5703	-68.2992
17.1437	-61.7925
-7.951	-14.412
21.5721	-158.267
57.4352	-152.339
37.7331	-121.881
38.806	-104.528
38.8059	-104.528
-7.27003	72.37
-7.27002	72.37
28.486	-80.576
13.6159	144.855
13.6152	144.856
13.6152	144.856
13.6159	144.855
21.569	-158.262
21.5623	-158.242
21.5623	-158.242
21.569	-158.262
-4.67175	55.4778
57.5986	-152.178
42.9447	-71.6303
42.9478	-71.6266
42.9478	-71.6266
42.9448	-71.6303
37.4038	-122.029
37.4035	-122.029
51.1167	-0.906364
51.1179	-0.906425
76.5154	-68.5988
76.5163	-68.599
76.5154	-68.5989
76.5159	-68.6
76.5152	-68.5956
76.5157	-68.605
28.4859	-80.5758
34.8256	-120.505
34.8226	-120.502
34.8226	-120.502
34.8256	-120.505
40.58	-74.2166
31.9053	35.9315
69.294	16.021
78.9314	11.8503
-2.99556	40.1945
40.6495	16.7041
40.6487	16.7046
25.6137	-80.3848
25.6134	-80.3837
25.614	-80.3849
39.5686	-79.579
39.281	-79.736
41.4642	-75.13
40.8935	-76.4393
34.0808	-118.896
31.4233	-104.759
50.0481	-5.18194
52.032	-2.84049
28.5	-80.57
28.465	-80.5375
28.4753	-80.5395
28.4806	-80.5421
28.4859	-80.5446
28.4911	-80.5471
28.4963	-80.5494
28.5016	-80.5518
28.4506	-80.5623
28.449	-80.562
28.5068	-80.5542
28.4657	-80.5369
28.4606	-80.5403
28.461	-80.5398
28.431	-80.575
28.4446	-80.5705
28.4433	-80.5712
28.4285	-80.5778
28.4662	-80.5363
28.4393	-80.5803
28.4519	-80.5563
28.4537	-80.5556
28.5218	-80.5611
28.4669	-80.5356
28.4394	-80.5733
28.4407	-80.5726
28.4522	-80.5594
28.4472	-80.5649
28.4458	-80.5656
28.5122	-80.5567
28.4714	-80.5377
28.4684	-80.541
28.534	-80.568
28.5312	-80.5645
28.562	-80.5772
28.5835	-80.5829
28.4585	-80.5284
28.5289	-80.5906
28.4632	-80.5831
28.517	-80.5634
28.4816	-80.5765
45.5858	-75.8093
45.5844	-75.8081
53.2127	-105.933
53.2121	-105.926
-33.1511	-70.6664
-33.1515	-70.6683
-33.1518	-70.6673
39.505	75.929
40.4514	116.859
18.313	109.311
34.3152	-118.487
-0.623	-78.578
43.817	125.324
42.68	125.53
37.114	79.922
46.8	130.32
24.89	67.03
29.7	116
23.03	113.14
36.066	120.383
-22.5741	14.5475
1.3645	173.156
43.874	120.09
34.5	109.51
24.48	118.09
25.6	103.82
-7.91667	-14.3333
67.8765	21.0623
67.8765	21.0623
67.8832	21.0604
67.8781	21.0634
67.8782	21.0634
67.8896	21.0657
67.8842	21.0608
5.09885	-52.6399
5.23	-52.77
-25.8864	27.7074
43.4287	1.49941
-49.3529	70.2573
-49.3519	70.256
67.8571	20.9643
67.8584	20.9669
0.35463	9.6753
-5.92781	-35.1643
41.1	100.5
41.3088	100.317
41.3061	100.313
41.0152	100.78
41.1593	100.78
40.958	100.291
40.9607	100.298
41.2804	100.305
41.2832	100.305
38.84	111.61
38.8486	111.608
38.8354	111.607
19.68	111.01
28.246	102.029
28.2474	102.029
28.2455	102.027
28.2495	102.023
39.5793	-104.939
34.0312	-118.457
39.514	-105.025
-31.5242	-64.4636
1.2977	103.774
52.1394	-106.626
45.5188	-73.3967
-25.8855	27.7069
-25.8865	27.7066
-25.8855	27.7079
-25.8881	27.7075
-25.8855	27.7075
-25.8897	27.6862
-25.8867	27.7126
-25.8869	27.7067
-25.8867	27.7126
-25.887	27.712
-34.616	20.226
-34.6202	20.2206
-30.313	149.565
-35.4005	148.983
-35.3985	148.982
-35.4007	148.981
-35.4024	148.981
-35.3985	148.978
-35.405	148.983
-32.9983	148.264
-31.2678	149.1
-35.4047	148.983
-35.4045	148.982
-35.4047	148.983
24.9678	121.187
33.7395	-106.364
48.0862	11.2789
64.9724	-147.518
64.9768	-147.518
64.9721	-147.513
69.6625	18.9408
41.245	-75.8827
39.2768	-104.807
33.9827	-118.425
35.736	-120.754
35.5001	139.398
51.987	-1.187
13.5836	144.85
38.726	-77.145
26.296	127.776
39.443	-77.416
39.102	-76.765
49.402	7.534
36.5594	-76.2672
21.52	-157.995
40.929	14.049
18.5447	-88.2636
48.0872	11.2812
68.3179	-133.544
68.3176	-133.538
53.3297	13.07
78.9277	11.8835
-63.3211	-57.9012
-8.04	-34.9
47.8812	11.0783
47.8812	11.0854
47.8801	11.0853
47.8812	11.0836
45.3498	-75.8909
-28.695	114.842
47.8794	11.9844
45.3377	-75.5867
50.8862	-4.5537
-41.5764	173.739
38.516	-79.28
46.6821	-120.357
41.132	-104.736
33.3655	-111.814
41.4684	-87.7764
38.723	-78.667
29.7599	-98.0635
40.784	-74.2203
47.592	-117.551
67.8607	20.4339
78.1531	16.0289
67.3638	26.6304
69.5867	19.2219
69.5865	19.2264
65.1167	-147.461
65.1178	-147.431
78.2307	15.3897
78.2302	15.3981
37.9249	-75.4765
41.8275	12.6759
52.2184	4.41994
5.2325	-52.7524
5.3047	-52.8345
5.23241	-52.7757
5.2393	-52.7685
5.24036	-52.7518
5.236	-52.775
27.7643	-15.6338
40.4527	-4.36755
5.25144	-52.8047
5.25185	-52.8058
-35.776	-69.3983
